# Supplementary material
Source: publisher figshare collection journal article supplement (https://asha.figshare.com/articles/dataset/_/26169859)
Supplement: Supplementary file 1 [file 1]

**Supplemental Material S3.** Characteristics of studies on the prognostic value of MRI findings for CI outcomes.

| Study Country           | Study design | Diagnosis                                                                             | Number of Participants: total, girls                                                   | Age, mean, or range | Age at CI (months)                                   | Device            | Uni/Bi         | Follow-up period (months) | Imaging                               | Outcome measures                                    | Findings                                                                                                                                                                                                                                                                                                   |
|-------------------------|--------------|---------------------------------------------------------------------------------------|----------------------------------------------------------------------------------------|---------------------|------------------------------------------------------|-------------------|----------------|---------------------------|---------------------------------------|-----------------------------------------------------|------------------------------------------------------------------------------------------------------------------------------------------------------------------------------------------------------------------------------------------------------------------------------------------------------------|
| Kari 2022 (USA)         | Retro        | CVN abnormalities, 20 with AD                                                         | 40, 18                                                                                 | 7-78 months         | NR                                                   | CLs, HAs, Bimodal | 18/2<br>20 HAs | NR                        | T2 MRI and CT scan                    | SAT                                                 | IAC midpoint diameter and the number of nerves in the IAC were predictors of post-CI outcomes.                                                                                                                                                                                                             |
| Han 2019 (Korea)        | Retro        | Bilateral CND                                                                         | 25, 12                                                                                 | 21.0 months         | NR                                                   | Nucleus           | NR             | 24                        | MRI                                   | CAP, IT-MAIS                                        | The area ratio of CN to FN at the CPA was correlated with CAP and IT-MAIS scores.                                                                                                                                                                                                                          |
| Gaurav 2019 (India)     | Pros         | SNHL with or without MRI abnormalities <sup>a</sup>                                   | 50, 25                                                                                 | 5.06 years          | NR                                                   | Nucleus, AB       | NR             | 12                        | MRI                                   | CAP, MAIS                                           | MRI abnormalities observed in 15 children were associated with lower post-CI outcomes.                                                                                                                                                                                                                     |
| Chung 2018 (Korea)      | Retro        | CND<br><br>SNHL                                                                       | 56, NR<br>G1: 17,<br>CNC<1.44mm<br>G2: 14 CNC<br>between 1.4-2 mm<br>G3: 25<br>CNC>2mm | NR                  | G1: 27.92<br>G2: 29.32<br>G3: 33.43                  | NR                | NR             | 6, 12, 24, and 36         | MRI in the axial plane                | CAP, open-set speech tests, picture vocabulary test | Groups 1 and 2 with smaller CNC diameters had poor post-CI outcomes, and group 3 with normal CNC diameters showed good CI outcomes. <sup>b</sup>                                                                                                                                                           |
| Birman 2016 (Australia) | Retro        | CND<br>G1: aplasia 64%<br>G2: hypoplasia 25%<br>G3: normal CN 11%<br><br>54% with ADs | 50, 24                                                                                 | 0-16 years          | Median 25                                            | NR                | 29/21          | 12                        | MRI                                   | CAP                                                 | CI outcomes were significantly affected by aplasia/hypoplasia and developmental delay. CAP scores were obtained between 5 and 7 for 47% and 89% of children with aplasia and hypoplasia, respectively. The main mode of communication was significantly influenced by the presence of developmental delay. |
| Chao 2016 (China)       | Retro        | Bilateral CND<br><br>Matched SNHL<br><br>No AD/C                                      | CND: 10, 6<br><br>SNHL: 10, 6                                                          | NR                  | CND: 4.45 (1.5-7.4) year<br>SNHL: 4.0 (1.3-6.5) year | Nucleus           | All uni        | 12                        | T2 MRI in the axial plane and CT scan | CAP, SIR                                            | Poor outcomes in children with CND compared to children with SNHL.<br>No association was identified between CN and CNC diameters and CI outcomes in CND.                                                                                                                                                   |

|                       |       |                                                                               |        |           |                                                     |             |                            |                                                     |                                       |                                                                       |                                                                                                                                                                                                                                                                                   |
|-----------------------|-------|-------------------------------------------------------------------------------|--------|-----------|-----------------------------------------------------|-------------|----------------------------|-----------------------------------------------------|---------------------------------------|-----------------------------------------------------------------------|-----------------------------------------------------------------------------------------------------------------------------------------------------------------------------------------------------------------------------------------------------------------------------------|
|                       |       |                                                                               |        |           |                                                     |             |                            |                                                     |                                       |                                                                       | Overall, better results were obtained in children with CN>FN.                                                                                                                                                                                                                     |
| Jeong 2015 (Korea)    | Retro | CVN malformation<br>A: 16<br>B: 31<br>C: 6<br>D= 6°<br>No narrow CNC with ADs | 59, 27 | 5.8 years | A: 5.82 B: 6.58<br>C: 3.07<br>D: 5.32               | Nucleus     | NR                         | 36 or more                                          | TBCT, MRI                             | Open-set MWT                                                          | Better post-CI speech perception scores were reported in CN malformation types A and B compared to types C and D. The test scores did not differ between types A and B and those without CN malformation.                                                                         |
| Jeong 2013 (Korea)    | Retro | ANSD with CND                                                                 | 15, 5  | 3.5 years | 70                                                  | Nucleus     | NR                         | 72.8                                                | MRI and CT scan                       | CAP, IT-MAIS, open-set MWT                                            | The normal size of CNC and CN was correlated with excellent speech perception abilities after CI. A narrow or obliterated CNC and a deficient CN were associated with poor speech perception abilities.                                                                           |
| Yamazaki 2015 (Japan) | Retro | CND, 4 with AD                                                                | 19, NR | NR        | 2.67 (11.5)                                         | Nucleus     | 5/14                       | 24                                                  | T2 MRI in the axial plane and CT scan | Pre/post-operative CAP                                                | Poor speech performance was found in children with FN>CN.                                                                                                                                                                                                                         |
| Valero 2012 (Canada)  | Retro | ANSD with hypoplasia<br>Matched SNHL                                          | 19, 10 | NR        | ANSD: 50.4 (12 to 155)<br>SNHL: 51.24 (12 to 172.2) | Nucleus     | ANSD : 17/2<br>SNHL : 17/2 | At CI activation and every 3 months up to 24 months | MRI and CT scan                       | ESP, IT-MAIS, WIPI, GASP, MLNT, BKB words, LNT phonemes, BKB phonemes | Speech performance, the PROSPER score, <sup>d</sup> was poor in both the initial and the most recent assessment and did not improve over time.                                                                                                                                    |
| Teagle 2010 (USA)     | Retro | ANSD with medical comorbidities, 42% with prematurity                         | 52, 19 | 7.3 years | 47, 12-213                                          | Nucleus, AB | 2/50                       | 41 (6-118)                                          | MRI and CT scan                       | ESP, PBK, MLNT, LNT, IT-MAIS                                          | 38% had abnormal findings on preoperative MRI of the brain and inner ear. 50% demonstrated open-set speech perception abilities, and nearly 30% were unable to complete the test because of low CI experience or developmental delays. No child with CND achieved open-set speech |

perception abilities. In a subgroup of children with the results of MRI and PBK tests, good open-set speech perception skills were associated with normal MRI results.

AB: Advanced Bionics, AD/C: additional disabilities/comorbidities, ANC: auditory nerve canal, ANSD: auditory neuropathy spectrum disorder, BKB: Bamford-Kowal-Bench sentence test, CAP: Categories of Auditory Performance, CDI: child development inventory, CI: cochlear implant, CN: cochlear nerve, CNC: cochlear nerve canal, CPA: cerebellopontine angle, CVN: cochleovestibular nerve, ESP: early speech perception, FN: facial nerve, GASP: Glendonald Auditory Screening Procedure, HINT: Hearing in Noise Test, IAC: internal auditory canal, LNT: lexical neighborhood test, MLNT: Multi-syllable Lexical Neighborhood Test, NR: not reported, Pros: prospective, PROSPER: Pediatric Ranked Order Speech Perception, Retro: retrospective, SAT: speech awareness threshold, SIR: Speech Intelligibility Rating, SNHL: sensorineural hearing loss, SP: speech perception, TBCT: temporal bone computed tomography, VCN: vestibulocochlear nerve, WIPI: Word Intelligibility by Picture Identification.

<sup>a</sup> Demyelination of the brain white matter ( $n = 9$ ), Mondini's dysplasia ( $n = 1$ ), communicating hydrocephalus ( $n = 1$ ), asymmetrical cochlear size ( $n = 1$ ), and features of mastoiditis ( $n = 3$ ).

<sup>b</sup> Overall, the correlation between CAP score and CNC diameter at 24 and 36 months was 0.377 and 0.395; the correlation between open-set word discrimination score and CNC diameter at 24 months was 0.533, and the correlation between CNC diameter and picture vocabulary test score was 0.342.

<sup>c</sup> Four subtypes of cochleovestibular nerve (CVN) malformation were introduced based on the cochlea and modiolus morphology: normal cochlea and normal modiolus (type A,  $n = 16$ ), malformed cochlea and partial modiolus (type B,  $n = 31$ ), malformed cochlea and no modiolus (type C,  $n = 6$ ), and no cochlea and no modiolus (type D,  $n = 6$ ).

<sup>d</sup> The Pediatric Ranked Order Speech Perception (PROSPER) score allows for the comparison of speech and language outcomes across varying testing conditions, both between participants and within a single participant tested repeatedly over time. In PROSPER, tests are ranked according to their relative difficulty and quantified from 0 (least complex) to 34 (most complex) (Arjmandi et al., 2022; Valero et al., 2012).
