# Supplementary material
Source: publisher figshare collection journal article supplement (https://asha.figshare.com/articles/dataset/_/26169859)
Supplement: Supplementary file 2 [file 1]

## Supplemental Material S2. Characteristics of studies on the prognostic value of eABR for CI outcomes.

| Study Country         | Study design | Diagnosis                            | Number of Participants: total, girls | Age, mean or range (years) | Age at CI (months)                            | Device      | Uni/Bi                     | Follow-up period (months)                           | Electro-physiology                    | Outcome measures                               | Findings                                                                                                                                                                                                  |
|-----------------------|--------------|--------------------------------------|--------------------------------------|----------------------------|-----------------------------------------------|-------------|----------------------------|-----------------------------------------------------|---------------------------------------|------------------------------------------------|-----------------------------------------------------------------------------------------------------------------------------------------------------------------------------------------------------------|
| Wang 2015 (China)     | Retro        | SNHL                                 | 40, 14                               | 1.7-7.0                    | 12-58.8                                       | Nucleus     | NR                         | 3 to 26                                             | Intra-operative eABR                  | CAP and SIR growth <sup>a</sup>                | A correlation was found between the eV threshold and SIR growth. Children with better CAP growth had a lower eV threshold compared to those with lower CAP growth.                                        |
| Yamazaki 2015 (Japan) | Retro        | CND                                  | 19, NR                               | NR                         | 26.7 (11.5)                                   | Nucleus     | 5/14                       | 24                                                  | Intra-operative eABR <sup>b</sup>     | CAP                                            | Poor speech performance in children with delayed eV compared to better speech performance in children with positive eV.                                                                                   |
| Jeon 2013 (Korea)     | Retro        | ANSD<br>SNHL                         | 11, 6<br>SNHL: 9, NR                 | 4 to 8                     | NR                                            | Nucleus, AB | Uni                        | ANSD: 40.4 (8 to 80)<br>SNHL: 29.4 (13 to 59)       | Post-operative eABR <sup>c</sup>      | CAP                                            | eABR was not recorded in 6 out of 11 children with ANSD. Children with recorded eABR showed relatively good speech performance post-CI, while the nonresponse group demonstrated variable outcomes.       |
| Jeong 2013 (Korea)    | Retro        | ANSD                                 | 15, 5                                | 3.5                        | 70                                            | Nucleus     | NR                         | 72.8                                                | Post-operative eABR (3 weeks post-CI) | CAP, IT-MAIS, open-set MWT                     | eABR results were not different in children with good and poor speech perception outcomes.                                                                                                                |
| Jin 2013 (China)      | Retro        | CND (IACS)<br>Matched SNHL           | NA                                   | NR                         | NA                                            | NA          | NA                         | NA                                                  | Intra-operative eABR                  | CAP, SIR                                       | A higher threshold and lower dynamic range of eABR, and lower speech performance outcomes were identified in the IACS group compared to the control group. The CAP score and eABR grade were correlated.  |
| Valero 2012 (Canada)  | Retro        | ANSD with hypoplasia<br>Matched SNHL | 19, 10                               | NR                         | ANSD: 50.4 (12-155)<br>SNHL: 51.24 (12-172.2) | Nucleus     | ANSD : 17/2<br>SNHL : 17/2 | At CI activation and every 3 months up to 24 months | Post-operative eABR                   | ESP, IT-MAIS, WIPI, GASP, MLNT, BKB words, LNT | In children with hypoplasia, single eV waves were recorded in some children, but most responses were abnormal. eV was also significantly delayed compared with the control group. Speech performance, the |

|                         |       |                                                                               |                                                          |            |                |                    |         |                                                              |                                                                    |                                                          |                                                                                                                                                                                                                                                                                              |
|-------------------------|-------|-------------------------------------------------------------------------------|----------------------------------------------------------|------------|----------------|--------------------|---------|--------------------------------------------------------------|--------------------------------------------------------------------|----------------------------------------------------------|----------------------------------------------------------------------------------------------------------------------------------------------------------------------------------------------------------------------------------------------------------------------------------------------|
|                         |       |                                                                               |                                                          |            |                |                    |         |                                                              |                                                                    | phonemes, BKB phonemes                                   | PROSPER score, <sup>d</sup> was poor in both the initial and the most recent assessment and did not improve over time.                                                                                                                                                                       |
| Song 2010 (Korea)       | Retro | CND, 9 with aplasia                                                           | 13, NR                                                   | 4.3 (1-13) | NR             | Nucleus, AB        | NR      | 26.5 (12-68)                                                 | Intra- and post-operative eABR and eCAP at 1, 3, 6, 12, 18, and 24 | CAP, IT-MAIS                                             | The average IAC was 1.78 mm (0.75-2.57 mm). Post-CI CAP scores ranged from 0 to 4. eABR was good, variable, and absent in 4, 3, and 6 children, respectively, which corresponded with CAP scores 4, 4, or 2, and 2 or 0, respectively.                                                       |
| Gibson 2009 (Australia) | Retro | SNHL                                                                          | 245, NR                                                  | NR         | NR             | Nucleus            | NR      | 12 months for 245 children<br><br>24 months for 148 children | Intra-operative eABR                                               | MSPS <sup>d</sup>                                        | eABR waveforms were significantly different between those who scored 4 <sub>≥</sub> compared to lower scores in the Melbourne scale. After two years, the outcome showed greater differences.                                                                                                |
| Kim 2008 (USA)          | Retro | CVN abnormalities<br>G1: Mondini<br>G2: other CV abnormalities<br>G3: Aplasia | G1: 11, NR<br>G2: 20, NR<br>G3: 8, NR                    | NR         | 12-159         | Nucleus, AB, MedEl | All uni | 36                                                           | Preoperative promontory eABR                                       | GASP for words and sentences, NUCHIP, minimal pairs test | Children with lower preoperative eABR thresholds had better postoperative speech performance. Larger eV amplitude and shorter latency were associated with better speech performance. Open-set sentence recognition test was possible in 73% of group 1, 30% of group 2, and 38% of group 3. |
| Walton 2008 (Australia) | Retro | A: Bilateral ANSD<br>B: Bilateral ANSD with CND <sup>e</sup>                  | A: 39, 14<br><br>B: 15, 7                                | ≤15        | A: 40<br>B: 44 | Nucleus            | NR      | 12                                                           | Post-operative eABR, axial T2 MRI                                  | MSPS                                                     | Children with CND showed worse speech perception scores (median score 1 vs. 4), higher rates of abnormal eABR (87% vs. 23%), and more associated inner ear abnormalities than children with ANSD without CND.                                                                                |
| Nikolopoulos 2000 (UK)  | Pros  | SNHL                                                                          | N: 47, NR<br>G1: 35 with clear eV<br>G2: 12 without eABR | NR         | 58             | NR                 | NR      | 12, 24, and 36                                               | Intra-operative eABR at the time of CI surgery                     | Iowa sentence test, CDT, CAP, SIR                        | Children with no preoperative eABR performed at levels comparable with children who had clear preoperative eABR.                                                                                                                                                                             |

AB: Advanced Bionics, ANSD: auditory neuropathy spectrum disorder, BKB: Bamford-Kowal-Bench sentence test, CAP: Categories of Auditory Performance, CDI: child development inventory; CDT: Connected Discourse Tracking, CI: cochlear implant, CVN: cochleovestibular nerve, DEAP: diagnostic evaluation of articulation and phonology, eABR: electric auditory brainstem response, ESP: early speech perception, G: group, GASP: Glendonald Auditory Screening Procedure, IACS: internal auditory canal stenosis, LNT: lexical neighborhood test, MLNT: Multi-syllable Lexical Neighborhood Test, MSPS: Melbourne speech perception score, NA: not accessible, NR: not reported, Pros: prospective, Retro: retrospective, SIR: Speech Intelligibility Rating, SNHL: sensorineural hearing loss, SP: speech perception.

<sup>a</sup> Growth referred to improvement in CAP and SIR test scores.

<sup>b</sup> The eV was considered present (positive eV) when two or more tested electrodes showed evoked waves meeting the following criteria: 1) reproducible responses with amplitude greater than 0.15 KV, 2) a current-dependent increase in amplitude, which suggests a neuronal response rather than a myogenic response, and 3) 3.8 to 5.0 milliseconds of the wave latency (Yamazaki et al., 2015).

<sup>c</sup> The results of eABR were grouped into 3 categories: 1) good response: reproducible wave V responses at all apical, middle, and basal electrodes, with an eABR threshold of less than 1750 KA; 2) variable response: reproducible wave V responses measured only in limited electrodes and/or an eABR threshold of more than 1750 KA; 3) nonresponse: no identifiable wave V response in any of the electrodes.

<sup>d</sup> MSPS includes 7 categories, in which levels 5, 6, and 7 show that open-set recognition of speech has been achieved (Walton et al., 2008).

<sup>e</sup> Comorbidity: A 78% and B 67%, severe comorbidity: A 24% and B 47%, brain abnormality: A 56% and B 53%, Inner ear abnormality: A 8% and B 93%.
