# Supplementary material
Source: publisher figshare collection journal article supplement (https://asha.figshare.com/articles/dataset/_/26169859)
Supplement: Supplementary file 3 [file 1]

**Supplemental Material S1.** Characteristics of studies on the prognostic value of NRT and eCAP for CI outcomes.

| Study Country                 | Study design | Diagnosis                               | Number of Participants: total, girls      | Age, mean or range (years)     | Age at CI (months)                                   | Device                           | Uni/Bi                          | Follow-up period (months)                           | Electrophysiology                                             | Outcome measures                                                      | Findings                                                                                                                                                                                                                                                                                                                                                                                                                             |
|-------------------------------|--------------|-----------------------------------------|-------------------------------------------|--------------------------------|------------------------------------------------------|----------------------------------|---------------------------------|-----------------------------------------------------|---------------------------------------------------------------|-----------------------------------------------------------------------|--------------------------------------------------------------------------------------------------------------------------------------------------------------------------------------------------------------------------------------------------------------------------------------------------------------------------------------------------------------------------------------------------------------------------------------|
| Motasaddi Zarandy 2018 (Iran) | Pros         | SNHL                                    | 10, 7                                     | 3-5                            | 50.4                                                 | Nucleus                          | All Uni                         | 6                                                   | Postoperative NRT                                             | Newsha development al scale                                           | Improvement in speech and language scores post-implantation despite no change in eCAP hearing thresholds.                                                                                                                                                                                                                                                                                                                            |
| Attias 2017 (Israel)          | Pros         | ANSD<br>Matched SNHL                    | ANSD: 16, 6<br>SNHL: 16, 8                | ANSD: 5-12.2<br>SNHL: 6.7-13.2 | ANSD: 11-34<br>SNHL: 10-26                           | Majority with Nucleus, AB, MedEl | ANSD: 6/10<br>SNHL: 8/8         | 40                                                  | Postoperative eT, eCL, eDR, and tNRT only in Nucleus CI users | MWT, SWT, and EST in quiet and noise                                  | Despite reduced eT, eCL, eDR, and tNRT in children with ANSD, they showed no difference from children with SNHL in speech performance outcomes.                                                                                                                                                                                                                                                                                      |
| Jeong 2013 (Korea)            | Retro        | ANSD                                    | 15, 5                                     | 3.5                            | 70                                                   | Nucleus                          | NR                              | 72.08                                               | Postoperative eCAP (3 weeks postsurgery)                      | CAP, IT-MAIS, open-set MWT                                            | Better speech perception abilities were observed in children with robust eCAP results.                                                                                                                                                                                                                                                                                                                                               |
| Valero 2012 (Canada)          | Retro        | CND (hypoplasia)<br>Matched SNHL        | 19, 10                                    | NR                             | Hypo-plasia: 50.4 (12-155)<br>SNHL: 51.24 (12-172.2) | Nucleus                          | Hypo-plasia: 17/2<br>SNHL: 17/2 | At CI activation and every 3 months up to 24 months | Postoperative eCAP                                            | ESP, IT-MAIS, WIPI, GASP, MLNT, BKB words, LNT phonemes, BKB phonemes | In children with hypoplasia, initial eCAPs were mostly absent. In the first and last assessments, eCAP was recorded in 2 out of 7 and 2 out of 6 children with hypoplasia, respectively, and in 17 out of 17 matched peers with SNHL in both assessments. Compared to peers with SNHL, speech performance, the PROSPER scores, <sup>a</sup> was lower in both initial and the most recent assessments and did not improve over time. |
| Buchman 2011 (USA)            | Retro        | Inner ear malformation or CND with AD/C | 76, 46%<br>CND: 22, NR<br>Non-CND: 54, NR | NR                             | 72.0 (15.6-216)                                      | Nucleus, AB                      | 64/12                           | 12-120                                              | Intraoperative NRT                                            | SRI-Q, ESP, PBK, CNC words                                            | Open-set speech perception was achieved in 100% of children with IP-EVA, 50% of children with hypoplastic malformations, and 19% of children with CND. eCAP was absent in 61%, 33%, and 4%                                                                                                                                                                                                                                           |

|                    |       |                                                                     |                                  |            |                          |                    |                        |                          |                                                          |                                         |                                                                                                                                                                                                                                                                                                                                 |
|--------------------|-------|---------------------------------------------------------------------|----------------------------------|------------|--------------------------|--------------------|------------------------|--------------------------|----------------------------------------------------------|-----------------------------------------|---------------------------------------------------------------------------------------------------------------------------------------------------------------------------------------------------------------------------------------------------------------------------------------------------------------------------------|
|                    |       |                                                                     |                                  |            |                          |                    |                        |                          |                                                          |                                         | of children with CND, hypoplastic malformations, and IP-EVA, respectively. Robust eCAP recording was associated with higher speech perception scores. Non-verbal communication strategies were more common in children with hypoplastic malformations (69%) and CND (95%) compared to those with IP-EVA (18%).                  |
| Fulmer 2011 (USA)  | Retro | ANSD with co-morbidities <sup>b</sup><br><br>Matched SNHL           | ANSD: 10, NR<br><br>SNHL: 10, NR | NR         | ANSD: 44.4<br>SNHL: 58.8 | Nucleus, AB, MedEl | ANSD: 8/2<br>SNHL: 6/4 | ANSD: 43.2<br>SNHL: 51.6 | Postoperative eCAP                                       | SRT for mono-syllabic and spondee words | Children with ANSD and SNHL were not different in SRT and eCAP recovery rates.                                                                                                                                                                                                                                                  |
| Cosetti 2010 (USA) | Retro | SNHL                                                                | 24, NR                           | 5-17       | Children: 7.5 years      | Nucleus            | NR                     | 12                       | Intraoperative tNRT                                      | Children: MLNT, PBK, LNT, GASP          | No correlation between tNRT results and open-set speech performance.                                                                                                                                                                                                                                                            |
| Song 2010 (Korea)  | Retro | CND, 9 with aplasia                                                 | 13, NR                           | 4.3 (1-13) | NR                       | Nucleus, AB        | NR                     | 26.5 (12-68)             | Intra- and postoperative eCAP at 1, 3, 6, 12, 18, and 24 | CAP, IT-MAIS                            | The average IAC was 1.78 mm (0.75-2.57 mm). Post-CI CAP scores ranged from 0 to 4. Only 2 children showed stable eCAP responses in post-CI assessments. No correlation was found between eCAP and CAP results.                                                                                                                  |
| Teagle 2010 (USA)  | Retro | ANSD (9 with CND) with medical co-morbidities, 42% with prematurity | 52, 19                           | 7.3        | 47, 12-213               | Nucleus, AB        | 2/50                   | 41 (6-118)               | Intraoperative eCAP                                      | ESP, PBK, MLNT, LNT, IT-MAIS            | 50% demonstrated open-set speech perception abilities, and nearly 30% were unable to complete the test because of low CI experience or developmental delays. No child with CND achieved open-set speech perception abilities. In a subgroup of children with the results of eCAP and PBK tests, good open-set speech perception |

|                      |       |    |          |    |    |         |    |   |                     |                             |                                                                                                                                                        |
|----------------------|-------|----|----------|----|----|---------|----|---|---------------------|-----------------------------|--------------------------------------------------------------------------------------------------------------------------------------------------------|
|                      |       |    |          |    |    |         |    |   |                     |                             | skills were associated with robust eCAP responses.                                                                                                     |
| Guedes 2007 (Brazil) | Retro | NR | 100, 53% | NR | NR | Nucleus | NR | 6 | Intra-operative NRT | Hearing capacity test, GASP | NRT response was recorded in 72% of children. Open-set sentence test scores were significantly better in children with present compared to absent NRT. |

AB: advanced Bionics, AD/C: additional disabilities/comorbidities, ANSD: auditory neuropathy spectrum disorder, BKB: Bamford-Kowal-Bench sentence test, CAP: Categories of Auditory Performance, CDI: child development inventory, CI: cochlear implant, CL: comfortable level, CNC: consonant-nucleus-consonant, DEAP: diagnostic evaluation of articulation and phonology, DR: dynamic range, eCAP: electric compound action potential, ESP: early speech perception, EST: everyday sentence test, GASP: Glendonald Auditory Screening Procedure, IP-EVA: incomplete partition-enlarged vestibular aqueduct, IT-MAIS: Infant-Toddler Meaningful Auditory Integration Scale, LNT: lexical neighborhood test, MLNT: Multi-syllable Lexical Neighborhood Test, MWT: Mono-syllabic Word Test, NR: not reported, NRT: neural response telemetry, PBK: Phonetically Balanced Kindergarten, SIR: Speech Intelligibility Rating, SNHL: sensorineural hearing loss, SRI-Q: speech recognition index in quite, SP: speech perception, Pros: prospective, Retro: retrospective, SRT: speech recognition threshold, SWT: spondee word test, T: threshold, tNRT: predicted NRT, WIPI: Word Intelligibility by Picture Identification, WRS: word recognition score.

<sup>a</sup> The Pediatric Ranked Order Speech Perception (PROSPER) score allows for the comparison of speech and language outcomes across varying testing conditions, both between participants and within a single participant tested repeatedly over time. In PROSPER, tests are ranked according to their relative difficulty and quantified from 0 (least complex) to 34 (most complex) (Arjmandi et al., 2022; Valero et al., 2012).

<sup>b</sup> Including hyperbilirubinemia, family history, premature birth, hypoxia, perinatal infection, cystic fibrosis, Mondini malformation, attention deficit hyperactivity disorder (ADHD), autism
